# Supplementary material
Source: publisher figshare collection journal article supplement (https://acs.figshare.com/ndownloader/files/5163559)
Supplement: Supplementary file 1 [file 5163559]

  
data_c72h60n4o4 
_audit_creation_method            SHELXL-97 
_chemical_name_systematic 
; 
 ? 
; 
_chemical_name_common             ? 
_chemical_melting_point           ? 
_chemical_formula_moiety          ? 
_chemical_formula_sum 
 'C162 H156 N8 O14' 
_chemical_formula_weight          2438.95 
  
loop_ 
 _atom_type_symbol 
 _atom_type_description 
 _atom_type_scat_dispersion_real 
 _atom_type_scat_dispersion_imag 
 _atom_type_scat_source 
 'C'  'C'   0.0033   0.0016 
 'International Tables Vol C Tables 4.2.6.8 and 6.1.1.4' 
 'H'  'H'   0.0000   0.0000 
 'International Tables Vol C Tables 4.2.6.8 and 6.1.1.4' 
 'N'  'N'   0.0061   0.0033 
 'International Tables Vol C Tables 4.2.6.8 and 6.1.1.4' 
 'O'  'O'   0.0106   0.0060 
 'International Tables Vol C Tables 4.2.6.8 and 6.1.1.4' 
  
_symmetry_cell_setting            Triclinic 
_symmetry_space_group_name_H-M    P1 
  
loop_ 
 _symmetry_equiv_pos_as_xyz 
 'x, y, z' 
  
_cell_length_a                    14.1790(4) 
_cell_length_b                    16.5360(5) 
_cell_length_c                    19.6720(6) 
_cell_angle_alpha                 107.6200(10) 
_cell_angle_beta                  97.1700(10) 
_cell_angle_gamma                 114.3300(10) 
_cell_volume                      3836.7(2) 
_cell_formula_units_Z             2 
_cell_measurement_temperature     153(2) 
_cell_measurement_reflns_used     9538 
_cell_measurement_theta_min       2.165      
_cell_measurement_theta_max       23.116 
  
_exptl_crystal_description        block 
_exptl_crystal_colour             colorless 
_exptl_crystal_size_max           0.32 
_exptl_crystal_size_mid           0.27 
_exptl_crystal_size_min           0.22 
_exptl_crystal_density_meas       'not measured' 
_exptl_crystal_density_diffrn     1.056 
_exptl_crystal_density_method     'not measured' 
_exptl_crystal_F_000              1296 
_exptl_absorpt_coefficient_mu     0.067 
_exptl_absorpt_correction_type    none 
_exptl_absorpt_correction_T_min   none 
_exptl_absorpt_correction_T_max   none 
_exptl_absorpt_process_details    none 
  
_exptl_special_details 
; 
 ? 
; 
  
_diffrn_ambient_temperature       153(2) 
_diffrn_radiation_wavelength      0.71073 
_diffrn_radiation_type            MoK\a 
_diffrn_radiation_source          'fine-focus sealed tube' 
_diffrn_radiation_monochromator   graphite 
_diffrn_measurement_device_type   'Bruker SMART APEX CCD area detector' 
_diffrn_measurement_method        'phi and omega scans' 
_diffrn_detector_area_resol_mean  ? 
_diffrn_standards_number          ? 
_diffrn_standards_interval_count  ? 
_diffrn_standards_interval_time   ? 
_diffrn_standards_decay_%         ? 
_diffrn_reflns_number             53692 
_diffrn_reflns_av_R_equivalents   0.0182 
_diffrn_reflns_av_sigmaI/netI     0.0775 
_diffrn_reflns_limit_h_min        -21 
_diffrn_reflns_limit_h_max        21 
_diffrn_reflns_limit_k_min        -25 
_diffrn_reflns_limit_k_max        24 
_diffrn_reflns_limit_l_min        -29 
_diffrn_reflns_limit_l_max        28 
_diffrn_reflns_theta_min          1.47 
_diffrn_reflns_theta_max          32.53 
_reflns_number_total              47739 
_reflns_number_gt                 21412 
_reflns_threshold_expression      >2sigma(I) 
  
_computing_data_collection        'Bruker SMART' 
_computing_cell_refinement        'Bruker SMART' 
_computing_data_reduction         'Bruker SHELXTL' 
_computing_structure_solution     'SHELXS-97 (Sheldrick, 1990)' 
_computing_structure_refinement   'SHELXL-97 (Sheldrick, 1997)' 
_computing_molecular_graphics     'Bruker SHELXTL' 
_computing_publication_material   'Bruker SHELXTL' 
  
_refine_special_details 
; 
 Refinement of F^2^ against ALL reflections.  The weighted R-factor wR and 
 goodness of fit S are based on F^2^, conventional R-factors R are based 
 on F, with F set to zero for negative F^2^. The threshold expression of 
 F^2^ > 2sigma(F^2^) is used only for calculating R-factors(gt) etc. and is 
 not relevant to the choice of reflections for refinement.  R-factors based 
 on F^2^ are statistically about twice as large as those based on F, and R- 
 factors based on ALL data will be even larger. 
; 
  
_refine_ls_structure_factor_coef  Fsqd 
_refine_ls_matrix_type            full 
_refine_ls_weighting_scheme       calc 
_refine_ls_weighting_details 
 'calc w=1/[\s^2^(Fo^2^)+(0.1691P)^2^+0.0000P] where P=(Fo^2^+2Fc^2^)/3' 
_atom_sites_solution_primary      direct 
_atom_sites_solution_secondary    difmap 
_atom_sites_solution_hydrogens    geom 
_refine_ls_hydrogen_treatment     fixed 
_refine_ls_extinction_method      SHELXL 
_refine_ls_extinction_coef        0.0053(8) 
_refine_ls_extinction_expression 
 'Fc^*^=kFc[1+0.001xFc^2^\l^3^/sin(2\q)]^-1/4^' 
_refine_ls_abs_structure_details 
 'Flack H D (1983), Acta Cryst. A39, 876-881' 
_refine_ls_abs_structure_Flack    0.2(9) 
_refine_ls_number_reflns          47739 
_refine_ls_number_parameters      1658 
_refine_ls_number_restraints      3 
_refine_ls_R_factor_all           0.1522 
_refine_ls_R_factor_gt            0.0971 
_refine_ls_wR_factor_ref          0.2700 
_refine_ls_wR_factor_gt           0.2424 
_refine_ls_goodness_of_fit_ref    0.865 
_refine_ls_restrained_S_all       0.865 
_refine_ls_shift/su_max           0.004 
_refine_ls_shift/su_mean          0.000 
  
loop_ 
 _atom_site_label 
 _atom_site_type_symbol 
 _atom_site_fract_x 
 _atom_site_fract_y 
 _atom_site_fract_z 
 _atom_site_U_iso_or_equiv 
 _atom_site_adp_type 
 _atom_site_occupancy 
 _atom_site_symmetry_multiplicity 
 _atom_site_calc_flag 
 _atom_site_refinement_flags 
 _atom_site_disorder_assembly 
 _atom_site_disorder_group 
O1A O 0.2796(2) 0.37646(16) 0.87207(13) 0.0529(6) Uani 1 1 d . . . 
H1AO H 0.3335 0.3880 0.9023 0.079 Uiso 1 1 calc R . . 
O2A O 0.2882(2) 0.39760(19) 0.72260(15) 0.0529(6) Uani 1 1 d . . . 
H2AO H 0.3295 0.4503 0.7233 0.079 Uiso 1 1 calc R . . 
O3A O 0.4433(2) 0.68638(19) 0.95346(15) 0.0612(7) Uani 1 1 d . . . 
H3AO H 0.4205 0.6824 0.9115 0.092 Uiso 1 1 calc R . . 
O4A O 0.48353(19) 0.66531(17) 1.09926(14) 0.0487(6) Uani 1 1 d . . . 
H4AO H 0.4723 0.6153 1.1048 0.073 Uiso 1 1 calc R . . 
O5A O 0.1415(4) 0.4080(3) 0.9780(2) 0.1063(13) Uani 1 1 d . . . 
O6A O 0.4423(8) 0.8855(7) 0.8335(5) 0.193(3) Uiso 1 1 d . . . 
O7A O 0.1863(7) 0.8629(8) 0.7687(5) 0.182(3) Uani 1 1 d . . . 
O1B O 0.84591(19) 0.77326(16) 0.43327(13) 0.0435(5) Uani 1 1 d . . . 
H1BO H 0.7925 0.7803 0.4238 0.065 Uiso 1 1 calc R . . 
O2B O 1.08782(19) 0.82445(16) 0.52871(12) 0.0458(5) Uani 1 1 d . . . 
H2BO H 1.1251 0.8801 0.5333 0.069 Uiso 1 1 calc R . . 
O3B O 1.0715(2) 1.05810(17) 0.41526(17) 0.0617(7) Uani 1 1 d . . . 
H3BO H 1.1301 1.0644 0.4347 0.093 Uiso 1 1 calc R . . 
O4B O 0.8253(2) 1.03200(17) 0.37816(14) 0.0553(6) Uani 1 1 d . . . 
H4BO H 0.7786 0.9858 0.3829 0.083 Uiso 1 1 calc R . . 
O5B O 0.7574(7) 0.7211(5) 0.2644(4) 0.166(2) Uani 1 1 d . . . 
O6B O 0.7126(5) 0.2056(4) 0.5236(3) 0.143(2) Uani 1 1 d . . . 
O7B O 0.4337(4) 0.2184(3) 0.4246(2) 0.0944(11) Uani 1 1 d . . . 
N1A N 0.3557(3) 0.5799(2) 0.73673(16) 0.0516(7) Uani 1 1 d . . . 
H1A1 H 0.3712 0.5702 0.7762 0.062 Uiso 1 1 calc R . . 
N2A N 0.5279(2) 0.7484(2) 0.84254(16) 0.0505(7) Uani 1 1 d . . . 
H2A1 H 0.4685 0.7499 0.8446 0.061 Uiso 1 1 calc R . . 
N3A N 0.3561(2) 0.48396(19) 1.08890(15) 0.0437(6) Uani 1 1 d . . . 
H3A2 H 0.3779 0.4978 1.0530 0.052 Uiso 1 1 calc R . . 
N4A N 0.3162(2) 0.3059(2) 0.97745(14) 0.0461(6) Uani 1 1 d . . . 
H4A2 H 0.2578 0.3106 0.9721 0.055 Uiso 1 1 calc R . . 
N1B N 1.2366(2) 0.96124(19) 0.49912(16) 0.0423(6) Uani 1 1 d . . . 
H1B2 H 1.1743 0.9579 0.4981 0.051 Uiso 1 1 calc R . . 
N2B N 1.2661(2) 1.1521(2) 0.51538(16) 0.0457(6) Uani 1 1 d . . . 
H2B2 H 1.2596 1.1243 0.4691 0.055 Uiso 1 1 calc R . . 
N3B N 0.6690(2) 0.85415(19) 0.33913(15) 0.0436(6) Uani 1 1 d . . . 
H3B1 H 0.7304 0.8761 0.3704 0.052 Uiso 1 1 calc R . . 
N4B N 0.6437(2) 0.74883(19) 0.43318(16) 0.0446(6) Uani 1 1 d . . . 
H4B2 H 0.6536 0.7167 0.3939 0.054 Uiso 1 1 calc R . . 
C1A C 0.0772(3) -0.0095(2) 0.6757(2) 0.0555(9) Uani 1 1 d . . . 
H1A H 0.0932 -0.0538 0.6872 0.067 Uiso 1 1 calc R . . 
C2A C 0.0046(3) -0.0387(3) 0.6093(2) 0.0606(10) Uani 1 1 d . . . 
H2A H -0.0267 -0.1024 0.5756 0.073 Uiso 1 1 calc R . . 
C3A C -0.0226(3) 0.0240(3) 0.5915(2) 0.0615(10) Uani 1 1 d . . . 
H3A H -0.0748 0.0017 0.5471 0.074 Uiso 1 1 calc R . . 
C4A C 0.0264(3) 0.1202(3) 0.6387(2) 0.0523(8) Uani 1 1 d . . . 
H4A H 0.0100 0.1629 0.6247 0.063 Uiso 1 1 calc R . . 
C5A C 0.1518(3) 0.2524(2) 0.76001(18) 0.0445(7) Uani 1 1 d . . . 
C6A C 0.2295(3) 0.2821(2) 0.82468(18) 0.0448(7) Uani 1 1 d . . . 
C7A C 0.2570(3) 0.2164(2) 0.84319(17) 0.0428(7) Uani 1 1 d . . . 
C8A C 0.2067(3) 0.1222(3) 0.7953(2) 0.0505(8) Uani 1 1 d . . . 
H8A H 0.2242 0.0791 0.8077 0.061 Uiso 1 1 calc R . . 
C9A C 0.1284(3) 0.0882(2) 0.72723(19) 0.0444(7) Uani 1 1 d . . . 
C10A C 0.1025(3) 0.1546(2) 0.70948(18) 0.0454(7) Uani 1 1 d . . . 
C11A C -0.0578(3) 0.2453(3) 0.7670(2) 0.0572(9) Uani 1 1 d . . . 
H11A H -0.0406 0.2013 0.7780 0.069 Uiso 1 1 calc R . . 
C12A C -0.1554(3) 0.2405(3) 0.7698(2) 0.0659(11) Uani 1 1 d . . . 
H12A H -0.2040 0.1933 0.7825 0.079 Uiso 1 1 calc R . . 
C13A C -0.1833(3) 0.3061(4) 0.7536(3) 0.0698(12) Uani 1 1 d . . . 
H13A H -0.2504 0.3019 0.7549 0.084 Uiso 1 1 calc R . . 
C14A C -0.1119(3) 0.3752(3) 0.7361(2) 0.0619(10) Uani 1 1 d . . . 
H14A H -0.1307 0.4188 0.7260 0.074 Uiso 1 1 calc R . . 
C15A C 0.0672(3) 0.4558(3) 0.71543(19) 0.0537(9) Uani 1 1 d . . . 
H15A H 0.0502 0.5008 0.7061 0.064 Uiso 1 1 calc R . . 
C16A C 0.1646(3) 0.4625(3) 0.71174(18) 0.0484(8) Uani 1 1 d . . . 
C17A C 0.1914(3) 0.3941(3) 0.72713(18) 0.0471(8) Uani 1 1 d . . . 
C18A C 0.1209(3) 0.3218(2) 0.74447(18) 0.0448(7) Uani 1 1 d . . . 
C19A C 0.0172(3) 0.3155(3) 0.74787(18) 0.0475(8) Uani 1 1 d . . . 
C20A C -0.0102(3) 0.3834(3) 0.73286(19) 0.0512(8) Uani 1 1 d . . . 
C21A C 0.2430(3) 0.5353(3) 0.6890(2) 0.0540(9) Uani 1 1 d . . . 
H21A H 0.2395 0.5043 0.6376 0.065 Uiso 1 1 calc R . . 
H21B H 0.2227 0.5853 0.6921 0.065 Uiso 1 1 calc R . . 
C22A C 0.4378(3) 0.6416(3) 0.7109(2) 0.0503(8) Uani 1 1 d . . . 
H22A H 0.4152 0.6861 0.7001 0.060 Uiso 1 1 calc R . . 
C23A C 0.5463(3) 0.7013(3) 0.7730(2) 0.0527(8) Uani 1 1 d . . . 
H23A H 0.5704 0.6562 0.7806 0.063 Uiso 1 1 calc R . . 
C24A C 0.6212(3) 0.7926(4) 0.9084(2) 0.0637(10) Uani 1 1 d . . . 
H24A H 0.6829 0.8416 0.9021 0.076 Uiso 1 1 calc R . . 
H24B H 0.6397 0.7437 0.9129 0.076 Uiso 1 1 calc R . . 
C25A C 0.7057(3) 1.0749(3) 1.1387(2) 0.0605(10) Uani 1 1 d . . . 
H25A H 0.7622 1.1141 1.1251 0.073 Uiso 1 1 calc R . . 
C26A C 0.6866(3) 1.1127(3) 1.2031(2) 0.0578(10) Uani 1 1 d . . . 
H26A H 0.7305 1.1776 1.2337 0.069 Uiso 1 1 calc R . . 
C27A C 0.6021(3) 1.0561(3) 1.2241(2) 0.0512(8) Uani 1 1 d . . . 
H27A H 0.5904 1.0830 1.2690 0.061 Uiso 1 1 calc R . . 
C28A C 0.5352(3) 0.9600(2) 1.17899(19) 0.0450(7) Uani 1 1 d . . . 
H28A H 0.4779 0.9232 1.1934 0.054 Uiso 1 1 calc R . . 
C29A C 0.4851(3) 0.8169(3) 1.06417(19) 0.0453(7) Uani 1 1 d . . . 
C30A C 0.5077(3) 0.7802(3) 0.99901(19) 0.0492(8) Uani 1 1 d . . . 
C31A C 0.5972(3) 0.8374(3) 0.9782(2) 0.0579(10) Uani 1 1 d . . . 
C32A C 0.6592(3) 0.9333(3) 1.0242(2) 0.0636(11) Uani 1 1 d . . . 
H32A H 0.7159 0.9721 1.0105 0.076 Uiso 1 1 calc R . . 
C33A C 0.6402(3) 0.9749(3) 1.0909(2) 0.0507(8) Uani 1 1 d . . . 
C34A C 0.5524(3) 0.9168(2) 1.11153(18) 0.0420(7) Uani 1 1 d . . . 
C35A C 0.2897(3) 0.8416(3) 1.0687(3) 0.0620(10) Uani 1 1 d . . . 
H35A H 0.3459 0.8843 1.0572 0.074 Uiso 1 1 calc R . . 
C36A C 0.1994(4) 0.8520(3) 1.0707(3) 0.0757(14) Uani 1 1 d . . . 
H36A H 0.1950 0.9018 1.0603 0.091 Uiso 1 1 calc R . . 
C37A C 0.1147(4) 0.7904(3) 1.0879(3) 0.0733(13) Uani 1 1 d . . . 
H37A H 0.0539 0.7987 1.0891 0.088 Uiso 1 1 calc R . . 
C38A C 0.1205(3) 0.7178(3) 1.1030(2) 0.0586(10) Uani 1 1 d . . . 
H38A H 0.0629 0.6763 1.1143 0.070 Uiso 1 1 calc R . . 
C39A C 0.2181(3) 0.6271(2) 1.11663(19) 0.0458(7) Uani 1 1 d . . . 
H39A H 0.1599 0.5841 1.1265 0.055 Uiso 1 1 calc R . . 
C40A C 0.3068(3) 0.6145(2) 1.11687(17) 0.0424(7) Uani 1 1 d . . . 
C41A C 0.3946(3) 0.6777(2) 1.09975(17) 0.0395(7) Uani 1 1 d . . . 
C42A C 0.3925(3) 0.7530(2) 1.08324(17) 0.0418(7) Uani 1 1 d . . . 
C43A C 0.2989(3) 0.7659(2) 1.0842(2) 0.0447(7) Uani 1 1 d . . . 
C44A C 0.2111(3) 0.7036(2) 1.10184(19) 0.0471(8) Uani 1 1 d . . . 
C45A C 0.3136(3) 0.5358(3) 1.13855(19) 0.0495(8) Uani 1 1 d . . . 
H45A H 0.3599 0.5645 1.1891 0.059 Uiso 1 1 calc R . . 
H45B H 0.2422 0.4907 1.1372 0.059 Uiso 1 1 calc R . . 
C46A C 0.3568(3) 0.4049(2) 1.10801(18) 0.0460(8) Uani 1 1 d . . . 
H46A H 0.2823 0.3608 1.1037 0.055 Uiso 1 1 calc R . . 
C47A C 0.3963(3) 0.3483(2) 1.04971(18) 0.0454(7) Uani 1 1 d . . . 
H47A H 0.4653 0.3945 1.0473 0.054 Uiso 1 1 calc R . . 
C48A C 0.3439(3) 0.2546(3) 0.91497(19) 0.0499(8) Uani 1 1 d . . . 
H48A H 0.3499 0.2015 0.9227 0.060 Uiso 1 1 calc R . . 
H48B H 0.4130 0.2981 0.9119 0.060 Uiso 1 1 calc R . . 
C49A C 0.4470(3) 0.5807(2) 0.64042(19) 0.0459(7) Uani 1 1 d . . . 
C50A C 0.4711(3) 0.5065(3) 0.6384(2) 0.0512(8) Uani 1 1 d . . . 
H50A H 0.4847 0.4964 0.6818 0.061 Uiso 1 1 calc R . . 
C51A C 0.4752(3) 0.4478(3) 0.5734(2) 0.0531(9) Uani 1 1 d . . . 
H51A H 0.4911 0.3985 0.5729 0.064 Uiso 1 1 calc R . . 
C52A C 0.4555(3) 0.4629(3) 0.5089(2) 0.0534(9) Uani 1 1 d . . . 
H52A H 0.4580 0.4231 0.4650 0.064 Uiso 1 1 calc R . . 
C53A C 0.4325(3) 0.5350(3) 0.50886(19) 0.0504(8) Uani 1 1 d . . . 
H53A H 0.4199 0.5447 0.4652 0.060 Uiso 1 1 calc R . . 
C54A C 0.4281(3) 0.5937(3) 0.5741(2) 0.0534(9) Uani 1 1 d . . . 
H54A H 0.4121 0.6428 0.5738 0.064 Uiso 1 1 calc R . . 
C55A C 0.6323(3) 0.7705(3) 0.74969(19) 0.0505(8) Uani 1 1 d . . . 
C56A C 0.7139(4) 0.7554(4) 0.7310(3) 0.0754(13) Uani 1 1 d . . . 
H56A H 0.7184 0.7013 0.7321 0.091 Uiso 1 1 calc R . . 
C57A C 0.7923(5) 0.8212(5) 0.7098(3) 0.0951(18) Uani 1 1 d . . . 
H57A H 0.8471 0.8091 0.6961 0.114 Uiso 1 1 calc R . . 
C58A C 0.7892(4) 0.9018(5) 0.7090(3) 0.0790(14) Uani 1 1 d . . . 
H58A H 0.8426 0.9460 0.6965 0.095 Uiso 1 1 calc R . . 
C59A C 0.7080(4) 0.9161(4) 0.7264(3) 0.0853(15) Uani 1 1 d . . . 
H59A H 0.7038 0.9705 0.7256 0.102 Uiso 1 1 calc R . . 
C60A C 0.6292(4) 0.8501(4) 0.7458(3) 0.0714(12) Uani 1 1 d . . . 
H60A H 0.5724 0.8610 0.7566 0.086 Uiso 1 1 calc R . . 
C61A C 0.4141(3) 0.2739(2) 1.07286(19) 0.0494(8) Uani 1 1 d . . . 
C62A C 0.3303(4) 0.1939(3) 1.0701(3) 0.0682(11) Uani 1 1 d . . . 
H62A H 0.2600 0.1830 1.0540 0.082 Uiso 1 1 calc R . . 
C63A C 0.3491(5) 0.1262(3) 1.0917(3) 0.0788(14) Uani 1 1 d . . . 
H63A H 0.2908 0.0713 1.0899 0.095 Uiso 1 1 calc R . . 
C64A C 0.4494(6) 0.1404(4) 1.1145(3) 0.0878(17) Uani 1 1 d . . . 
H64A H 0.4608 0.0948 1.1274 0.105 Uiso 1 1 calc R . . 
C65A C 0.5348(5) 0.2218(4) 1.1188(3) 0.0956(19) Uani 1 1 d . . . 
H65A H 0.6048 0.2327 1.1359 0.115 Uiso 1 1 calc R . . 
C66A C 0.5176(4) 0.2890(3) 1.0975(3) 0.0752(13) Uani 1 1 d . . . 
H66A H 0.5763 0.3442 1.0999 0.090 Uiso 1 1 calc R . . 
C67A C 0.4245(4) 0.4410(3) 1.18704(19) 0.0573(10) Uani 1 1 d . . . 
C68A C 0.5310(4) 0.5082(3) 1.2118(2) 0.0670(11) Uani 1 1 d . . . 
H68A H 0.5640 0.5346 1.1801 0.080 Uiso 1 1 calc R . . 
C69A C 0.5919(5) 0.5379(3) 1.2866(3) 0.0872(18) Uani 1 1 d . . . 
H69A H 0.6650 0.5827 1.3038 0.105 Uiso 1 1 calc R . . 
C70A C 0.5407(7) 0.4992(4) 1.3327(3) 0.098(2) Uani 1 1 d . . . 
H70A H 0.5792 0.5189 1.3817 0.118 Uiso 1 1 calc R . . 
C71A C 0.4374(7) 0.4345(4) 1.3082(3) 0.102(2) Uani 1 1 d . . . 
H71A H 0.4048 0.4078 1.3398 0.123 Uiso 1 1 calc R . . 
C72A C 0.3778(5) 0.4060(3) 1.2375(2) 0.0766(14) Uani 1 1 d . . . 
H72A H 0.3045 0.3623 1.2225 0.092 Uiso 1 1 calc R . . 
C73A C 0.1125(5) 0.4560(4) 0.9532(3) 0.0951(18) Uani 1 1 d . . . 
C74A C 0.0055(6) 0.4484(5) 0.9515(4) 0.115(2) Uani 1 1 d . . . 
H74A H -0.0320 0.4027 0.9719 0.173 Uiso 1 1 calc R . . 
H74B H -0.0351 0.4272 0.9010 0.173 Uiso 1 1 calc R . . 
H74C H 0.0133 0.5103 0.9804 0.173 Uiso 1 1 calc R . . 
C75A C 0.1866(5) 0.5265(3) 0.9236(3) 0.0915(17) Uani 1 1 d . . . 
H75A H 0.2605 0.5441 0.9449 0.137 Uiso 1 1 calc R . . 
H75B H 0.1777 0.5832 0.9369 0.137 Uiso 1 1 calc R . . 
H75C H 0.1680 0.4961 0.8703 0.137 Uiso 1 1 calc R . . 
C76A C 0.3634(10) 0.8713(9) 0.8703(7) 0.157(3) Uiso 1 1 d . . . 
C77A C 0.2896(16) 0.7931(14) 0.8783(11) 0.243(7) Uiso 1 1 d . . . 
H77A H 0.3051 0.7405 0.8604 0.364 Uiso 1 1 calc R . . 
H77B H 0.2185 0.7750 0.8502 0.364 Uiso 1 1 calc R . . 
H77C H 0.2929 0.8085 0.9300 0.364 Uiso 1 1 calc R . . 
C78A C 0.3866(16) 0.9506(14) 0.9179(11) 0.255(8) Uiso 1 1 d . . . 
H78A H 0.4633 0.9918 0.9327 0.383 Uiso 1 1 calc R . . 
H78B H 0.3642 0.9421 0.9605 0.383 Uiso 1 1 calc R . . 
H78C H 0.3503 0.9796 0.8976 0.383 Uiso 1 1 calc R . . 
C79A C 0.1326(8) 0.7910(7) 0.7100(6) 0.119(2) Uani 1 1 d . . . 
C80A C 0.1839(8) 0.7511(7) 0.6654(7) 0.149(3) Uani 1 1 d . . . 
H80A H 0.1952 0.7773 0.6279 0.223 Uiso 1 1 calc R . . 
H80B H 0.1395 0.6824 0.6419 0.223 Uiso 1 1 calc R . . 
H80C H 0.2522 0.7662 0.6955 0.223 Uiso 1 1 calc R . . 
C81A C 0.0207(9) 0.7505(8) 0.6871(9) 0.187(5) Uani 1 1 d . . . 
H81A H -0.0110 0.6985 0.7031 0.280 Uiso 1 1 calc R . . 
H81B H -0.0041 0.7263 0.6338 0.280 Uiso 1 1 calc R . . 
H81C H -0.0001 0.7987 0.7085 0.280 Uiso 1 1 calc R . . 
C1B C 0.7686(4) 0.5193(3) 0.5762(3) 0.0689(12) Uani 1 1 d . . . 
H1B H 0.7148 0.5083 0.6001 0.083 Uiso 1 1 calc R . . 
C2B C 0.8299(5) 0.4737(4) 0.5773(3) 0.0821(15) Uani 1 1 d . . . 
H2B H 0.8170 0.4315 0.6014 0.098 Uiso 1 1 calc R . . 
C3B C 0.9115(5) 0.4903(4) 0.5424(3) 0.0793(14) Uani 1 1 d . . . 
H3B H 0.9539 0.4601 0.5443 0.095 Uiso 1 1 calc R . . 
C4B C 0.9298(4) 0.5501(3) 0.5057(3) 0.0616(10) Uani 1 1 d . . . 
H4B H 0.9834 0.5592 0.4816 0.074 Uiso 1 1 calc R . . 
C5B C 0.8873(3) 0.6640(2) 0.46622(18) 0.0397(7) Uani 1 1 d . . . 
C6B C 0.8261(2) 0.7102(2) 0.46677(16) 0.0371(6) Uani 1 1 d . . . 
C7B C 0.7442(3) 0.6963(2) 0.50462(17) 0.0397(7) Uani 1 1 d . . . 
C8B C 0.7263(3) 0.6345(3) 0.5395(2) 0.0488(8) Uani 1 1 d . . . 
H8B H 0.6736 0.6254 0.5645 0.059 Uiso 1 1 calc R . . 
C9B C 0.7861(3) 0.5830(3) 0.5390(2) 0.0538(9) Uani 1 1 d . . . 
C10B C 0.8684(3) 0.5989(2) 0.5037(2) 0.0472(8) Uani 1 1 d . . . 
C11B C 0.8528(3) 0.5257(3) 0.3164(2) 0.0534(9) Uani 1 1 d . . . 
H11B H 0.7995 0.5100 0.3404 0.064 Uiso 1 1 calc R . . 
C12B C 0.8350(4) 0.4632(3) 0.2459(2) 0.0686(12) Uani 1 1 d . . . 
H12B H 0.7698 0.4065 0.2222 0.082 Uiso 1 1 calc R . . 
C13B C 0.9155(5) 0.4854(3) 0.2098(2) 0.0833(15) Uani 1 1 d . . . 
H13B H 0.9040 0.4428 0.1623 0.100 Uiso 1 1 calc R . . 
C14B C 1.0094(5) 0.5677(3) 0.2434(2) 0.0717(12) Uani 1 1 d . . . 
H14B H 1.0622 0.5805 0.2186 0.086 Uiso 1 1 calc R . . 
C15B C 1.1267(3) 0.7232(3) 0.3498(2) 0.0490(8) Uani 1 1 d . . . 
H15B H 1.1781 0.7379 0.3241 0.059 Uiso 1 1 calc R . . 
C16B C 1.1482(3) 0.7883(2) 0.42010(19) 0.0428(7) Uani 1 1 d . . . 
C17B C 1.0672(3) 0.7637(2) 0.45859(17) 0.0379(6) Uani 1 1 d . . . 
C18B C 0.9710(3) 0.6805(2) 0.42585(18) 0.0390(6) Uani 1 1 d . . . 
C19B C 0.9501(3) 0.6133(2) 0.35316(18) 0.0447(7) Uani 1 1 d . . . 
C20B C 1.0305(3) 0.6354(3) 0.3150(2) 0.0517(8) Uani 1 1 d . . . 
C21B C 1.2525(3) 0.8790(3) 0.4579(2) 0.0488(8) Uani 1 1 d . . . 
H21C H 1.2885 0.8935 0.4211 0.059 Uiso 1 1 calc R . . 
H21D H 1.2988 0.8700 0.4923 0.059 Uiso 1 1 calc R . . 
C22B C 1.3401(3) 1.0498(2) 0.5422(2) 0.0443(7) Uani 1 1 d . . . 
H22B H 1.3849 1.0637 0.5089 0.053 Uiso 1 1 calc R . . 
C23B C 1.3174(2) 1.1341(2) 0.57537(18) 0.0392(6) Uani 1 1 d . . . 
H23B H 1.2655 1.1150 0.6033 0.047 Uiso 1 1 calc R . . 
C24B C 1.2275(3) 1.2220(3) 0.5425(2) 0.0502(8) Uani 1 1 d . . . 
H24C H 1.2891 1.2846 0.5727 0.060 Uiso 1 1 calc R . . 
H24D H 1.1828 1.2028 0.5741 0.060 Uiso 1 1 calc R . . 
C25B C 1.1177(3) 1.4167(3) 0.4334(3) 0.0697(12) Uani 1 1 d . . . 
H25B H 1.1692 1.4732 0.4729 0.084 Uiso 1 1 calc R . . 
C26B C 1.0524(4) 1.4218(3) 0.3795(4) 0.0852(17) Uani 1 1 d . . . 
H26B H 1.0589 1.4812 0.3826 0.102 Uiso 1 1 calc R . . 
C27B C 0.9751(4) 1.3366(4) 0.3190(4) 0.0892(17) Uani 1 1 d . . . 
H27B H 0.9304 1.3401 0.2824 0.107 Uiso 1 1 calc R . . 
C28B C 0.9654(4) 1.2506(3) 0.3139(3) 0.0774(14) Uani 1 1 d . . . 
H28B H 0.9140 1.1955 0.2734 0.093 Uiso 1 1 calc R . . 
C29B C 1.0191(3) 1.1499(3) 0.3628(2) 0.0552(9) Uani 1 1 d . . . 
C30B C 1.0828(3) 1.1453(3) 0.4194(2) 0.0538(9) Uani 1 1 d . . . 
C31B C 1.1633(3) 1.2309(2) 0.4809(2) 0.0488(8) Uani 1 1 d . . . 
C32B C 1.1748(3) 1.3173(3) 0.4838(3) 0.0572(10) Uani 1 1 d . . . 
H32B H 1.2288 1.3729 0.5227 0.069 Uiso 1 1 calc R . . 
C33B C 1.1085(3) 1.3265(3) 0.4304(3) 0.0614(10) Uani 1 1 d . . . 
C34B C 1.0302(3) 1.2406(3) 0.3675(3) 0.0581(10) Uani 1 1 d . . . 
C35B C 1.0510(4) 1.0844(5) 0.2147(4) 0.0872(16) Uani 1 1 d . . . 
H35B H 1.1045 1.1421 0.2520 0.105 Uiso 1 1 calc R . . 
C36B C 1.0660(7) 1.0544(7) 0.1466(6) 0.114(2) Uani 1 1 d . . . 
H36B H 1.1284 1.0936 0.1379 0.137 Uiso 1 1 calc R . . 
C37B C 0.9924(8) 0.9682(8) 0.0900(5) 0.122(3) Uani 1 1 d . . . 
H37B H 1.0066 0.9480 0.0447 0.147 Uiso 1 1 calc R . . 
C38B C 0.8951(5) 0.9108(5) 0.1012(3) 0.0881(16) Uani 1 1 d . . . 
H38B H 0.8439 0.8530 0.0629 0.106 Uiso 1 1 calc R . . 
C39B C 0.7809(3) 0.8856(3) 0.1849(2) 0.0551(9) Uani 1 1 d . . . 
H39B H 0.7290 0.8277 0.1470 0.066 Uiso 1 1 calc R . . 
C40B C 0.7626(3) 0.9132(2) 0.25180(19) 0.0452(8) Uani 1 1 d . . . 
C41B C 0.8422(3) 1.0023(2) 0.3108(2) 0.0469(8) Uani 1 1 d . . . 
C42B C 0.9379(3) 1.0590(3) 0.3004(2) 0.0537(9) Uani 1 1 d . . . 
C43B C 0.9548(3) 1.0291(3) 0.2299(3) 0.0631(11) Uani 1 1 d . . . 
C44B C 0.8747(3) 0.9409(3) 0.1710(2) 0.0597(10) Uani 1 1 d . . . 
C45B C 0.6573(3) 0.8558(3) 0.26478(19) 0.0489(8) Uani 1 1 d . . . 
H45C H 0.6098 0.8828 0.2571 0.059 Uiso 1 1 calc R . . 
H45D H 0.6232 0.7901 0.2281 0.059 Uiso 1 1 calc R . . 
C46B C 0.5657(3) 0.8115(2) 0.35482(18) 0.0431(7) Uani 1 1 d . . . 
H46B H 0.5211 0.7459 0.3168 0.052 Uiso 1 1 calc R . . 
C47B C 0.5845(3) 0.8050(2) 0.4319(2) 0.0442(7) Uani 1 1 d . . . 
H47B H 0.6317 0.8708 0.4688 0.053 Uiso 1 1 calc R . . 
C48B C 0.6834(3) 0.7532(3) 0.50678(19) 0.0426(7) Uani 1 1 d . . . 
H48C H 0.6228 0.7276 0.5261 0.051 Uiso 1 1 calc R . . 
H48D H 0.7307 0.8199 0.5402 0.051 Uiso 1 1 calc R . . 
C49B C 1.4004(3) 1.0377(2) 0.6045(2) 0.0447(7) Uani 1 1 d . . . 
C50B C 1.3511(3) 1.0108(3) 0.6560(2) 0.0551(9) Uani 1 1 d . . . 
H50B H 1.2797 0.9977 0.6519 0.066 Uiso 1 1 calc R . . 
C51B C 1.4105(4) 1.0034(4) 0.7150(3) 0.0749(12) Uani 1 1 d . . . 
H51B H 1.3782 0.9847 0.7498 0.090 Uiso 1 1 calc R . . 
C52B C 1.5142(4) 1.0236(4) 0.7207(3) 0.0809(15) Uani 1 1 d . . . 
H52B H 1.5528 1.0189 0.7599 0.097 Uiso 1 1 calc R . . 
C53B C 1.5635(4) 1.0505(3) 0.6707(3) 0.0726(13) Uani 1 1 d . . . 
H53B H 1.6355 1.0649 0.6764 0.087 Uiso 1 1 calc R . . 
C54B C 1.5075(3) 1.0568(3) 0.6110(2) 0.0545(9) Uani 1 1 d . . . 
H54B H 1.5407 1.0734 0.5759 0.065 Uiso 1 1 calc R . . 
C55B C 1.4181(3) 1.2234(2) 0.6295(2) 0.0469(8) Uani 1 1 d . . . 
C56B C 1.4153(4) 1.2714(3) 0.7000(2) 0.0641(10) Uani 1 1 d . . . 
H56B H 1.3518 1.2479 0.7135 0.077 Uiso 1 1 calc R . . 
C57B C 1.5055(5) 1.3535(4) 0.7502(3) 0.0918(17) Uani 1 1 d . . . 
H57B H 1.5028 1.3852 0.7973 0.110 Uiso 1 1 calc R . . 
C58B C 1.6006(5) 1.3889(4) 0.7304(4) 0.100(2) Uani 1 1 d . . . 
H58B H 1.6612 1.4449 0.7640 0.119 Uiso 1 1 calc R . . 
C59B C 1.6053(4) 1.3413(4) 0.6614(3) 0.0785(15) Uani 1 1 d . . . 
H59B H 1.6695 1.3631 0.6485 0.094 Uiso 1 1 calc R . . 
C60B C 1.5126(3) 1.2603(3) 0.6114(2) 0.0561(9) Uani 1 1 d . . . 
H60B H 1.5147 1.2299 0.5638 0.067 Uiso 1 1 calc R . . 
C61B C 0.5067(3) 0.8695(2) 0.35109(18) 0.0422(7) Uani 1 1 d . . . 
C62B C 0.5526(3) 0.9655(2) 0.3987(2) 0.0480(8) Uani 1 1 d . . . 
H62B H 0.6181 0.9938 0.4350 0.058 Uiso 1 1 calc R . . 
C63B C 0.5007(3) 1.0203(3) 0.3926(2) 0.0518(8) Uani 1 1 d . . . 
H63B H 0.5314 1.0846 0.4249 0.062 Uiso 1 1 calc R . . 
C64B C 0.4033(3) 0.9782(3) 0.3380(2) 0.0494(8) Uani 1 1 d . . . 
H64B H 0.3690 1.0143 0.3334 0.059 Uiso 1 1 calc R . . 
C65B C 0.3574(3) 0.8820(3) 0.2906(2) 0.0502(8) Uani 1 1 d . . . 
H65B H 0.2926 0.8536 0.2537 0.060 Uiso 1 1 calc R . . 
C66B C 0.4085(3) 0.8280(2) 0.29823(18) 0.0433(7) Uani 1 1 d . . . 
H66B H 0.3761 0.7630 0.2673 0.052 Uiso 1 1 calc R . . 
C67B C 0.4831(3) 0.7666(2) 0.4533(2) 0.0532(9) Uani 1 1 d . . . 
C68B C 0.4767(3) 0.8158(3) 0.5224(3) 0.0616(11) Uani 1 1 d . . . 
H68B H 0.5367 0.8732 0.5550 0.074 Uiso 1 1 calc R . . 
C69B C 0.3832(5) 0.7814(4) 0.5437(4) 0.0906(19) Uani 1 1 d . . . 
H69B H 0.3806 0.8135 0.5907 0.109 Uiso 1 1 calc R . . 
C70B C 0.2923(5) 0.6964(6) 0.4922(6) 0.103(2) Uani 1 1 d . . . 
H70B H 0.2271 0.6744 0.5038 0.124 Uiso 1 1 calc R . . 
C71B C 0.2988(4) 0.6471(5) 0.4268(5) 0.109(3) Uani 1 1 d . . . 
H71B H 0.2391 0.5889 0.3953 0.131 Uiso 1 1 calc R . . 
C72B C 0.3926(3) 0.6800(3) 0.4039(3) 0.0752(14) Uani 1 1 d . . . 
H72B H 0.3948 0.6456 0.3575 0.090 Uiso 1 1 calc R . . 
C73B C 0.8467(8) 0.7364(7) 0.2519(6) 0.128(3) Uani 1 1 d . . . 
C74B C 0.9359(6) 0.8197(5) 0.3019(4) 0.1003(19) Uani 1 1 d . . . 
H74D H 0.9133 0.8642 0.3285 0.150 Uiso 1 1 calc R . . 
H74E H 0.9835 0.8483 0.2755 0.150 Uiso 1 1 calc R . . 
H74F H 0.9732 0.8048 0.3364 0.150 Uiso 1 1 calc R . . 
C75B C 0.9291(16) 0.7534(17) 0.1935(13) 0.305(11) Uani 1 1 d . . . 
H75D H 0.9037 0.7757 0.1592 0.457 Uiso 1 1 calc R . . 
H75E H 0.9271 0.6934 0.1664 0.457 Uiso 1 1 calc R . . 
H75F H 1.0019 0.8004 0.2228 0.457 Uiso 1 1 calc R . . 
C76B C 0.7889(6) 0.2179(4) 0.5025(3) 0.0920(18) Uani 1 1 d . . . 
C77B C 0.8975(7) 0.2328(6) 0.5330(4) 0.134(3) Uani 1 1 d . . . 
H77D H 0.9492 0.2994 0.5479 0.201 Uiso 1 1 calc R . . 
H77E H 0.9152 0.1932 0.4956 0.201 Uiso 1 1 calc R . . 
H77F H 0.8990 0.2155 0.5753 0.201 Uiso 1 1 calc R . . 
C78B C 0.7873(7) 0.2304(5) 0.4279(4) 0.114(2) Uani 1 1 d . . . 
H78D H 0.7807 0.1737 0.3906 0.171 Uiso 1 1 calc R . . 
H78E H 0.8532 0.2854 0.4338 0.171 Uiso 1 1 calc R . . 
H78F H 0.7270 0.2400 0.4128 0.171 Uiso 1 1 calc R . . 
C79B C 0.4448(5) 0.2275(4) 0.3691(3) 0.0814(14) Uani 1 1 d . . . 
C80B C 0.3550(12) 0.1787(8) 0.3008(6) 0.212(7) Uani 1 1 d . . . 
H80D H 0.2877 0.1541 0.3125 0.319 Uiso 1 1 calc R . . 
H80E H 0.3602 0.1264 0.2665 0.319 Uiso 1 1 calc R . . 
H80F H 0.3583 0.2238 0.2786 0.319 Uiso 1 1 calc R . . 
C81B C 0.5425(10) 0.2721(8) 0.3506(7) 0.167(4) Uani 1 1 d . . . 
H81D H 0.6031 0.3021 0.3940 0.250 Uiso 1 1 calc R . . 
H81E H 0.5411 0.3200 0.3332 0.250 Uiso 1 1 calc R . . 
H81F H 0.5490 0.2241 0.3122 0.250 Uiso 1 1 calc R . . 
  
loop_ 
 _atom_site_aniso_label 
 _atom_site_aniso_U_11 
 _atom_site_aniso_U_22 
 _atom_site_aniso_U_33 
 _atom_site_aniso_U_23 
 _atom_site_aniso_U_13 
 _atom_site_aniso_U_12 
O1A 0.0618(16) 0.0405(12) 0.0427(13) 0.0046(10) -0.0058(11) 0.0261(11) 
O2A 0.0518(14) 0.0576(15) 0.0585(15) 0.0278(13) 0.0119(12) 0.0317(12) 
O3A 0.0549(16) 0.0579(16) 0.0496(14) 0.0094(12) 0.0092(12) 0.0178(13) 
O4A 0.0459(13) 0.0421(12) 0.0541(14) 0.0131(11) 0.0036(11) 0.0244(11) 
O5A 0.116(3) 0.085(3) 0.096(3) 0.022(2) 0.002(2) 0.045(2) 
O7A 0.147(6) 0.260(9) 0.149(6) 0.069(7) 0.049(5) 0.113(6) 
O1B 0.0460(13) 0.0445(12) 0.0474(12) 0.0242(10) 0.0137(10) 0.0236(10) 
O2B 0.0480(13) 0.0423(12) 0.0426(12) 0.0138(10) 0.0151(10) 0.0189(11) 
O3B 0.0573(16) 0.0414(13) 0.0762(18) 0.0274(13) -0.0099(13) 0.0195(11) 
O4B 0.0522(15) 0.0391(12) 0.0491(14) 0.0063(11) -0.0007(11) 0.0108(11) 
O5B 0.176(7) 0.157(5) 0.190(6) 0.075(5) 0.075(5) 0.092(5) 
O6B 0.109(4) 0.131(4) 0.105(4) 0.008(3) 0.030(3) 0.011(3) 
O7B 0.109(3) 0.112(3) 0.082(2) 0.046(2) 0.043(2) 0.061(2) 
N1A 0.0589(18) 0.0528(16) 0.0417(15) 0.0214(13) 0.0012(13) 0.0271(14) 
N2A 0.0470(16) 0.0514(16) 0.0451(16) 0.0143(13) 0.0097(13) 0.0204(14) 
N3A 0.0548(16) 0.0406(14) 0.0350(13) 0.0107(11) 0.0082(12) 0.0263(13) 
N4A 0.0555(17) 0.0476(15) 0.0323(13) 0.0046(11) 0.0003(11) 0.0331(14) 
N1B 0.0336(13) 0.0442(14) 0.0538(16) 0.0199(13) 0.0121(12) 0.0222(12) 
N2B 0.0452(16) 0.0468(15) 0.0461(15) 0.0198(13) 0.0063(12) 0.0236(13) 
N3B 0.0383(14) 0.0378(13) 0.0439(14) 0.0105(11) -0.0051(11) 0.0171(11) 
N4B 0.0476(15) 0.0356(13) 0.0459(15) 0.0083(11) 0.0012(12) 0.0243(12) 
C1A 0.056(2) 0.0360(17) 0.063(2) 0.0058(16) 0.0250(19) 0.0193(16) 
C2A 0.046(2) 0.0465(19) 0.059(2) -0.0051(17) 0.0159(18) 0.0131(17) 
C3A 0.048(2) 0.062(2) 0.0415(19) -0.0058(17) 0.0044(15) 0.0171(18) 
C4A 0.049(2) 0.051(2) 0.0416(18) 0.0094(15) 0.0075(15) 0.0185(16) 
C5A 0.0455(18) 0.0511(18) 0.0370(16) 0.0150(14) 0.0086(14) 0.0255(15) 
C6A 0.054(2) 0.0425(17) 0.0382(16) 0.0116(14) 0.0118(14) 0.0261(15) 
C7A 0.0501(19) 0.0483(18) 0.0345(15) 0.0148(14) 0.0115(14) 0.0285(15) 
C8A 0.071(2) 0.0481(19) 0.0476(19) 0.0190(16) 0.0283(18) 0.0381(18) 
C9A 0.0455(18) 0.0427(17) 0.0411(17) 0.0113(14) 0.0162(14) 0.0202(14) 
C10A 0.0442(18) 0.0456(17) 0.0371(16) 0.0074(14) 0.0109(14) 0.0194(15) 
C11A 0.052(2) 0.061(2) 0.0463(19) 0.0139(17) 0.0035(16) 0.0240(18) 
C12A 0.050(2) 0.068(3) 0.058(2) 0.012(2) 0.0015(18) 0.021(2) 
C13A 0.041(2) 0.079(3) 0.071(3) 0.012(2) 0.0011(19) 0.028(2) 
C14A 0.053(2) 0.072(3) 0.054(2) 0.019(2) -0.0006(17) 0.032(2) 
C15A 0.058(2) 0.058(2) 0.0398(17) 0.0139(16) -0.0057(15) 0.0321(18) 
C16A 0.053(2) 0.0530(19) 0.0353(16) 0.0134(15) 0.0023(14) 0.0277(17) 
C17A 0.0484(19) 0.0517(19) 0.0349(16) 0.0114(14) 0.0012(14) 0.0251(16) 
C18A 0.0477(18) 0.0438(17) 0.0332(15) 0.0083(13) -0.0004(13) 0.0212(15) 
C19A 0.0420(17) 0.0485(18) 0.0349(16) 0.0050(14) -0.0029(13) 0.0183(15) 
C20A 0.0463(19) 0.055(2) 0.0372(17) 0.0078(15) -0.0057(14) 0.0236(17) 
C21A 0.058(2) 0.057(2) 0.055(2) 0.0261(18) 0.0063(17) 0.0350(18) 
C22A 0.056(2) 0.0462(18) 0.0511(19) 0.0197(16) 0.0063(16) 0.0284(17) 
C23A 0.058(2) 0.0479(19) 0.0477(19) 0.0148(16) 0.0077(16) 0.0258(17) 
C24A 0.046(2) 0.082(3) 0.048(2) 0.023(2) 0.0123(17) 0.019(2) 
C25A 0.045(2) 0.057(2) 0.057(2) 0.0236(19) -0.0064(17) 0.0088(17) 
C26A 0.051(2) 0.0483(19) 0.058(2) 0.0144(17) -0.0079(17) 0.0201(17) 
C27A 0.050(2) 0.0445(18) 0.053(2) 0.0132(16) 0.0010(16) 0.0247(16) 
C28A 0.0455(18) 0.0425(17) 0.0478(18) 0.0199(15) 0.0037(14) 0.0227(14) 
C29A 0.0421(18) 0.0512(19) 0.0419(17) 0.0196(15) 0.0048(14) 0.0226(15) 
C30A 0.0432(18) 0.058(2) 0.0371(16) 0.0146(15) 0.0054(14) 0.0208(16) 
C31A 0.0415(19) 0.078(3) 0.049(2) 0.029(2) 0.0087(16) 0.0215(19) 
C32A 0.0419(19) 0.082(3) 0.049(2) 0.028(2) 0.0014(16) 0.0146(19) 
C33A 0.0396(18) 0.055(2) 0.051(2) 0.0239(17) 0.0009(15) 0.0177(16) 
C34A 0.0406(17) 0.0433(16) 0.0405(16) 0.0198(14) 0.0006(13) 0.0193(14) 
C35A 0.055(2) 0.049(2) 0.077(3) 0.0284(19) 0.0017(19) 0.0229(18) 
C36A 0.055(2) 0.053(2) 0.118(4) 0.034(2) 0.003(2) 0.030(2) 
C37A 0.051(2) 0.057(2) 0.109(4) 0.023(2) 0.010(2) 0.033(2) 
C38A 0.0376(18) 0.048(2) 0.075(3) 0.0093(18) 0.0108(17) 0.0192(16) 
C39A 0.0504(19) 0.0386(16) 0.0429(17) 0.0128(14) 0.0106(15) 0.0194(15) 
C40A 0.0541(19) 0.0347(15) 0.0339(15) 0.0082(13) 0.0058(13) 0.0227(14) 
C41A 0.0385(16) 0.0415(16) 0.0328(15) 0.0068(13) 0.0030(12) 0.0213(13) 
C42A 0.0425(17) 0.0413(16) 0.0361(16) 0.0103(13) 0.0059(13) 0.0201(14) 
C43A 0.0410(17) 0.0361(15) 0.0501(18) 0.0113(14) 0.0029(14) 0.0191(13) 
C44A 0.0475(19) 0.0446(17) 0.0448(18) 0.0084(14) 0.0074(14) 0.0258(15) 
C45A 0.069(2) 0.0470(18) 0.0379(17) 0.0170(14) 0.0136(16) 0.0327(17) 
C46A 0.059(2) 0.0372(16) 0.0344(15) 0.0086(13) 0.0031(14) 0.0232(15) 
C47A 0.0520(19) 0.0386(16) 0.0401(16) 0.0100(13) 0.0019(14) 0.0235(15) 
C48A 0.063(2) 0.055(2) 0.0438(18) 0.0186(16) 0.0108(16) 0.0403(18) 
C49A 0.0495(19) 0.0407(17) 0.0443(17) 0.0182(14) 0.0088(15) 0.0188(15) 
C50A 0.062(2) 0.0456(18) 0.0460(19) 0.0237(16) 0.0100(16) 0.0236(17) 
C51A 0.060(2) 0.0453(19) 0.063(2) 0.0278(18) 0.0229(18) 0.0275(17) 
C52A 0.059(2) 0.0478(19) 0.0442(18) 0.0160(16) 0.0142(16) 0.0194(17) 
C53A 0.054(2) 0.0504(19) 0.0400(17) 0.0238(16) 0.0123(15) 0.0145(16) 
C54A 0.055(2) 0.0398(17) 0.062(2) 0.0267(17) 0.0064(17) 0.0180(16) 
C55A 0.050(2) 0.055(2) 0.0391(17) 0.0102(15) 0.0089(15) 0.0253(17) 
C56A 0.080(3) 0.081(3) 0.070(3) 0.020(2) 0.029(3) 0.047(3) 
C57A 0.070(3) 0.117(5) 0.091(4) 0.025(3) 0.047(3) 0.042(3) 
C58A 0.066(3) 0.106(4) 0.068(3) 0.039(3) 0.030(2) 0.036(3) 
C59A 0.064(3) 0.095(4) 0.113(4) 0.063(3) 0.032(3) 0.035(3) 
C60A 0.063(3) 0.083(3) 0.093(3) 0.054(3) 0.034(2) 0.040(2) 
C61A 0.061(2) 0.0381(16) 0.0443(18) 0.0105(14) 0.0017(15) 0.0268(16) 
C62A 0.080(3) 0.053(2) 0.079(3) 0.032(2) 0.020(2) 0.034(2) 
C63A 0.109(4) 0.050(2) 0.081(3) 0.031(2) 0.025(3) 0.039(3) 
C64A 0.138(5) 0.064(3) 0.068(3) 0.025(2) 0.000(3) 0.064(3) 
C65A 0.089(4) 0.067(3) 0.105(4) 0.015(3) -0.031(3) 0.043(3) 
C66A 0.067(3) 0.047(2) 0.090(3) 0.018(2) -0.015(2) 0.026(2) 
C67A 0.082(3) 0.0440(18) 0.0368(17) 0.0073(15) -0.0004(17) 0.0330(19) 
C68A 0.072(3) 0.056(2) 0.056(2) -0.0001(18) -0.008(2) 0.038(2) 
C69A 0.098(4) 0.054(2) 0.076(3) -0.016(2) -0.024(3) 0.049(3) 
C70A 0.179(7) 0.073(3) 0.037(2) 0.008(2) -0.007(3) 0.074(4) 
C71A 0.172(7) 0.065(3) 0.046(2) 0.010(2) -0.004(3) 0.052(4) 
C72A 0.114(4) 0.054(2) 0.047(2) 0.0159(19) 0.006(2) 0.035(3) 
C73A 0.101(4) 0.075(3) 0.079(3) 0.008(3) -0.012(3) 0.040(3) 
C74A 0.098(5) 0.115(5) 0.100(4) 0.010(4) -0.012(4) 0.055(4) 
C75A 0.131(5) 0.045(2) 0.057(3) -0.006(2) 0.003(3) 0.030(3) 
C79A 0.114(6) 0.137(7) 0.126(6) 0.070(6) 0.043(5) 0.064(5) 
C80A 0.140(7) 0.149(7) 0.224(10) 0.118(8) 0.078(7) 0.089(6) 
C81A 0.127(8) 0.138(8) 0.276(15) 0.049(9) 0.064(9) 0.068(7) 
C1B 0.074(3) 0.076(3) 0.093(3) 0.061(3) 0.046(3) 0.043(2) 
C2B 0.107(4) 0.100(4) 0.101(4) 0.077(3) 0.055(3) 0.071(3) 
C3B 0.099(4) 0.083(3) 0.104(4) 0.063(3) 0.046(3) 0.063(3) 
C4B 0.069(3) 0.069(2) 0.082(3) 0.048(2) 0.037(2) 0.047(2) 
C5B 0.0433(17) 0.0353(15) 0.0387(16) 0.0146(13) 0.0097(13) 0.0175(13) 
C6B 0.0329(15) 0.0311(14) 0.0330(14) 0.0060(12) 0.0015(11) 0.0094(12) 
C7B 0.0406(17) 0.0363(15) 0.0376(15) 0.0127(13) 0.0076(13) 0.0165(13) 
C8B 0.0415(18) 0.053(2) 0.058(2) 0.0285(17) 0.0195(16) 0.0224(16) 
C9B 0.056(2) 0.054(2) 0.072(2) 0.0401(19) 0.0292(19) 0.0303(18) 
C10B 0.054(2) 0.0446(18) 0.0528(19) 0.0231(16) 0.0190(16) 0.0286(16) 
C11B 0.062(2) 0.0440(19) 0.050(2) 0.0162(16) 0.0084(17) 0.0250(17) 
C12B 0.082(3) 0.053(2) 0.052(2) 0.0120(19) 0.003(2) 0.026(2) 
C13B 0.129(4) 0.054(2) 0.041(2) 0.0023(19) 0.024(3) 0.031(3) 
C14B 0.098(3) 0.060(3) 0.052(2) 0.014(2) 0.035(2) 0.036(3) 
C15B 0.055(2) 0.054(2) 0.052(2) 0.0240(17) 0.0273(17) 0.0321(17) 
C16B 0.0408(17) 0.0482(18) 0.0487(18) 0.0234(15) 0.0152(14) 0.0257(15) 
C17B 0.0451(17) 0.0382(15) 0.0388(16) 0.0177(13) 0.0132(13) 0.0249(14) 
C18B 0.0435(17) 0.0396(15) 0.0405(16) 0.0188(13) 0.0109(13) 0.0235(14) 
C19B 0.061(2) 0.0431(17) 0.0395(16) 0.0173(14) 0.0121(15) 0.0326(16) 
C20B 0.068(2) 0.0484(19) 0.0442(18) 0.0182(16) 0.0214(17) 0.0307(18) 
C21B 0.0426(18) 0.0515(19) 0.056(2) 0.0212(16) 0.0197(16) 0.0240(16) 
C22B 0.0366(16) 0.0498(18) 0.0522(19) 0.0255(16) 0.0145(14) 0.0211(14) 
C23B 0.0344(15) 0.0459(17) 0.0432(16) 0.0244(14) 0.0133(13) 0.0189(13) 
C24B 0.0429(18) 0.0456(18) 0.056(2) 0.0204(16) 0.0012(15) 0.0192(15) 
C25B 0.048(2) 0.052(2) 0.105(3) 0.039(2) 0.004(2) 0.0190(18) 
C26B 0.047(2) 0.063(3) 0.154(5) 0.063(3) 0.008(3) 0.025(2) 
C27B 0.056(3) 0.077(3) 0.130(4) 0.059(3) -0.007(3) 0.024(2) 
C28B 0.051(2) 0.058(2) 0.113(4) 0.044(3) -0.010(2) 0.0171(19) 
C29B 0.0349(17) 0.0487(19) 0.080(3) 0.0328(19) 0.0027(16) 0.0165(15) 
C30B 0.0406(18) 0.0418(18) 0.077(3) 0.0305(18) 0.0038(17) 0.0165(15) 
C31B 0.0331(16) 0.0435(17) 0.068(2) 0.0278(17) 0.0034(15) 0.0159(14) 
C32B 0.0334(17) 0.0435(18) 0.085(3) 0.0273(19) 0.0025(17) 0.0123(14) 
C33B 0.043(2) 0.049(2) 0.095(3) 0.040(2) 0.0107(19) 0.0183(16) 
C34B 0.0365(18) 0.051(2) 0.087(3) 0.039(2) 0.0054(18) 0.0165(16) 
C35B 0.068(3) 0.113(4) 0.115(4) 0.077(4) 0.041(3) 0.046(3) 
C36B 0.101(5) 0.123(6) 0.171(8) 0.090(6) 0.082(6) 0.064(5) 
C37B 0.139(7) 0.190(9) 0.135(6) 0.108(7) 0.092(6) 0.120(7) 
C38B 0.109(4) 0.114(4) 0.080(3) 0.054(3) 0.032(3) 0.074(4) 
C39B 0.055(2) 0.064(2) 0.0442(19) 0.0142(17) -0.0003(16) 0.0350(19) 
C40B 0.0391(17) 0.0445(17) 0.0459(18) 0.0138(14) -0.0049(13) 0.0221(14) 
C41B 0.0467(19) 0.0377(16) 0.0512(19) 0.0159(15) -0.0019(15) 0.0209(14) 
C42B 0.0434(19) 0.051(2) 0.066(2) 0.0309(18) 0.0000(16) 0.0207(16) 
C43B 0.057(2) 0.073(3) 0.074(3) 0.046(2) 0.010(2) 0.035(2) 
C44B 0.062(2) 0.074(3) 0.062(2) 0.037(2) 0.021(2) 0.042(2) 
C45B 0.0428(18) 0.0435(17) 0.0437(18) 0.0064(14) -0.0042(14) 0.0178(15) 
C46B 0.0408(17) 0.0275(14) 0.0451(17) 0.0048(12) -0.0059(13) 0.0136(12) 
C47B 0.0453(18) 0.0296(14) 0.0536(19) 0.0149(14) 0.0044(15) 0.0179(13) 
C48B 0.0389(16) 0.0495(18) 0.0461(17) 0.0224(15) 0.0135(14) 0.0239(14) 
C49B 0.0384(17) 0.0437(17) 0.0511(19) 0.0168(15) 0.0053(14) 0.0219(14) 
C50B 0.063(2) 0.066(2) 0.053(2) 0.0330(19) 0.0169(18) 0.0397(19) 
C51B 0.085(3) 0.083(3) 0.064(3) 0.038(2) 0.014(2) 0.042(3) 
C52B 0.079(3) 0.084(3) 0.069(3) 0.025(3) -0.015(3) 0.043(3) 
C53B 0.049(2) 0.068(3) 0.083(3) 0.014(2) -0.010(2) 0.031(2) 
C54B 0.047(2) 0.0460(18) 0.067(2) 0.0179(17) 0.0033(17) 0.0264(16) 
C55B 0.0444(18) 0.0448(17) 0.054(2) 0.0250(16) 0.0040(15) 0.0222(15) 
C56B 0.059(2) 0.065(2) 0.062(2) 0.016(2) 0.0035(19) 0.033(2) 
C57B 0.075(4) 0.083(3) 0.078(3) -0.003(3) -0.020(3) 0.039(3) 
C58B 0.070(4) 0.058(3) 0.122(5) 0.024(3) -0.037(3) 0.013(2) 
C59B 0.054(2) 0.064(3) 0.103(4) 0.051(3) -0.012(2) 0.012(2) 
C60B 0.0405(19) 0.057(2) 0.069(2) 0.0381(19) 0.0044(17) 0.0158(16) 
C61B 0.0399(17) 0.0367(15) 0.0456(17) 0.0125(13) 0.0058(13) 0.0188(13) 
C62B 0.0436(18) 0.0366(16) 0.054(2) 0.0137(15) 0.0036(15) 0.0167(14) 
C63B 0.059(2) 0.0428(18) 0.061(2) 0.0224(17) 0.0199(18) 0.0285(17) 
C64B 0.0471(19) 0.058(2) 0.062(2) 0.0299(18) 0.0238(17) 0.0346(17) 
C65B 0.0441(18) 0.058(2) 0.0499(19) 0.0202(17) 0.0105(15) 0.0264(16) 
C66B 0.0381(17) 0.0441(17) 0.0438(17) 0.0127(14) 0.0084(13) 0.0202(14) 
C67B 0.047(2) 0.0395(17) 0.080(3) 0.0344(18) 0.0114(18) 0.0219(15) 
C68B 0.053(2) 0.055(2) 0.104(3) 0.047(2) 0.034(2) 0.0348(18) 
C69B 0.083(4) 0.092(4) 0.171(6) 0.096(4) 0.076(4) 0.065(3) 
C70B 0.064(3) 0.113(5) 0.205(8) 0.120(6) 0.066(5) 0.058(4) 
C71B 0.045(3) 0.090(4) 0.193(8) 0.097(5) 0.000(4) 0.012(3) 
C72B 0.048(2) 0.056(2) 0.117(4) 0.053(3) 0.005(2) 0.0110(19) 
C73B 0.115(6) 0.159(8) 0.162(8) 0.098(7) 0.069(6) 0.080(6) 
C74B 0.098(4) 0.095(4) 0.123(5) 0.065(4) 0.020(4) 0.047(4) 
C75B 0.330(19) 0.48(3) 0.48(3) 0.36(2) 0.24(2) 0.37(2) 
C76B 0.084(4) 0.058(3) 0.083(4) -0.012(3) -0.008(3) 0.025(3) 
C77B 0.157(7) 0.120(5) 0.086(4) -0.003(4) -0.021(4) 0.078(5) 
C78B 0.143(6) 0.083(4) 0.095(4) 0.034(3) -0.003(4) 0.046(4) 
C79B 0.112(4) 0.069(3) 0.087(4) 0.038(3) 0.039(3) 0.057(3) 
C80B 0.289(15) 0.146(8) 0.127(7) 0.063(6) -0.072(8) 0.067(9) 
C81B 0.213(11) 0.163(8) 0.244(12) 0.130(9) 0.142(10) 0.140(9) 
  
_geom_special_details 
; 
 All esds (except the esd in the dihedral angle between two l.s. planes) 
 are estimated using the full covariance matrix.  The cell esds are taken 
 into account individually in the estimation of esds in distances, angles 
 and torsion angles; correlations between esds in cell parameters are only 
 used when they are defined by crystal symmetry.  An approximate (isotropic) 
 treatment of cell esds is used for estimating esds involving l.s. planes. 
; 
  
loop_ 
 _geom_bond_atom_site_label_1 
 _geom_bond_atom_site_label_2 
 _geom_bond_distance 
 _geom_bond_site_symmetry_2 
 _geom_bond_publ_flag 
O1A C6A 1.360(4) . ? 
O2A C17A 1.366(4) . ? 
O3A C30A 1.353(5) . ? 
O4A C41A 1.359(4) . ? 
O5A C73A 1.220(7) . ? 
O6A C76A 1.385(13) . ? 
O7A C79A 1.237(11) . ? 
O1B C6B 1.350(4) . ? 
O2B C17B 1.348(4) . ? 
O3B C30B 1.359(4) . ? 
O4B C41B 1.355(5) . ? 
O5B C73B 1.257(10) . ? 
O6B C76B 1.170(8) . ? 
O7B C79B 1.167(6) . ? 
N1A C22A 1.462(5) . ? 
N1A C21A 1.488(5) . ? 
N2A C23A 1.469(5) . ? 
N2A C24A 1.471(5) . ? 
N3A C45A 1.455(5) . ? 
N3A C46A 1.469(4) . ? 
N4A C48A 1.465(5) . ? 
N4A C47A 1.463(4) . ? 
N1B C22B 1.478(4) . ? 
N1B C21B 1.479(4) . ? 
N2B C24B 1.463(5) . ? 
N2B C23B 1.479(4) . ? 
N3B C46B 1.460(5) . ? 
N3B C45B 1.461(5) . ? 
N4B C48B 1.455(4) . ? 
N4B C47B 1.489(4) . ? 
C1A C2A 1.368(6) . ? 
C1A C9A 1.422(5) . ? 
C2A C3A 1.363(7) . ? 
C3A C4A 1.382(6) . ? 
C4A C10A 1.437(5) . ? 
C5A C6A 1.378(5) . ? 
C5A C10A 1.419(5) . ? 
C5A C18A 1.482(5) . ? 
C6A C7A 1.420(5) . ? 
C7A C8A 1.361(5) . ? 
C7A C48A 1.515(5) . ? 
C8A C9A 1.415(5) . ? 
C9A C10A 1.412(5) . ? 
C11A C12A 1.362(6) . ? 
C11A C19A 1.403(6) . ? 
C12A C13A 1.402(7) . ? 
C13A C14A 1.349(7) . ? 
C14A C20A 1.403(6) . ? 
C15A C16A 1.353(5) . ? 
C15A C20A 1.420(6) . ? 
C16A C17A 1.429(5) . ? 
C16A C21A 1.494(6) . ? 
C17A C18A 1.376(5) . ? 
C18A C19A 1.442(5) . ? 
C19A C20A 1.425(5) . ? 
C22A C49A 1.504(5) . ? 
C22A C23A 1.543(5) . ? 
C23A C55A 1.521(6) . ? 
C24A C31A 1.504(6) . ? 
C25A C26A 1.347(6) . ? 
C25A C33A 1.434(6) . ? 
C26A C27A 1.384(6) . ? 
C27A C28A 1.381(5) . ? 
C28A C34A 1.407(5) . ? 
C29A C30A 1.381(5) . ? 
C29A C34A 1.433(5) . ? 
C29A C42A 1.483(5) . ? 
C30A C31A 1.430(5) . ? 
C31A C32A 1.375(6) . ? 
C32A C33A 1.400(6) . ? 
C33A C34A 1.420(5) . ? 
C35A C36A 1.365(6) . ? 
C35A C43A 1.425(5) . ? 
C36A C37A 1.377(7) . ? 
C37A C38A 1.352(6) . ? 
C38A C44A 1.400(5) . ? 
C39A C40A 1.356(5) . ? 
C39A C44A 1.419(5) . ? 
C40A C41A 1.414(5) . ? 
C40A C45A 1.522(5) . ? 
C41A C42A 1.390(5) . ? 
C42A C43A 1.429(5) . ? 
C43A C44A 1.414(5) . ? 
C46A C67A 1.513(5) . ? 
C46A C47A 1.565(5) . ? 
C47A C61A 1.534(5) . ? 
C49A C50A 1.394(5) . ? 
C49A C54A 1.397(5) . ? 
C50A C51A 1.375(6) . ? 
C51A C52A 1.381(5) . ? 
C52A C53A 1.359(6) . ? 
C53A C54A 1.382(6) . ? 
C55A C56A 1.351(6) . ? 
C55A C60A 1.359(6) . ? 
C56A C57A 1.409(8) . ? 
C57A C58A 1.357(9) . ? 
C58A C59A 1.332(8) . ? 
C59A C60A 1.392(7) . ? 
C61A C66A 1.378(6) . ? 
C61A C62A 1.345(6) . ? 
C62A C63A 1.417(6) . ? 
C63A C64A 1.335(8) . ? 
C64A C65A 1.359(9) . ? 
C65A C66A 1.396(7) . ? 
C67A C68A 1.364(7) . ? 
C67A C72A 1.399(7) . ? 
C68A C69A 1.432(7) . ? 
C69A C70A 1.376(9) . ? 
C70A C71A 1.320(10) . ? 
C71A C72A 1.360(7) . ? 
C73A C74A 1.466(10) . ? 
C73A C75A 1.535(9) . ? 
C76A C78A 1.237(18) . ? 
C76A C77A 1.357(18) . ? 
C79A C81A 1.391(13) . ? 
C79A C80A 1.391(13) . ? 
C1B C2B 1.367(7) . ? 
C1B C9B 1.416(5) . ? 
C2B C3B 1.392(7) . ? 
C3B C4B 1.352(6) . ? 
C4B C10B 1.414(5) . ? 
C5B C6B 1.371(5) . ? 
C5B C10B 1.438(5) . ? 
C5B C18B 1.487(5) . ? 
C6B C7B 1.434(5) . ? 
C7B C8B 1.355(5) . ? 
C7B C48B 1.512(5) . ? 
C8B C9B 1.427(5) . ? 
C9B C10B 1.404(5) . ? 
C11B C12B 1.373(6) . ? 
C11B C19B 1.413(5) . ? 
C12B C13B 1.399(8) . ? 
C13B C14B 1.343(7) . ? 
C14B C20B 1.413(6) . ? 
C15B C16B 1.374(5) . ? 
C15B C20B 1.404(6) . ? 
C16B C17B 1.441(5) . ? 
C16B C21B 1.487(5) . ? 
C17B C18B 1.367(5) . ? 
C18B C19B 1.424(5) . ? 
C19B C20B 1.425(5) . ? 
C22B C23B 1.532(5) . ? 
C22B C49B 1.516(5) . ? 
C23B C55B 1.511(5) . ? 
C24B C31B 1.504(5) . ? 
C25B C26B 1.365(7) . ? 
C25B C33B 1.426(5) . ? 
C26B C27B 1.411(8) . ? 
C27B C28B 1.344(7) . ? 
C28B C34B 1.404(6) . ? 
C29B C30B 1.383(5) . ? 
C29B C34B 1.414(5) . ? 
C29B C42B 1.483(6) . ? 
C30B C31B 1.435(5) . ? 
C31B C32B 1.352(5) . ? 
C32B C33B 1.407(5) . ? 
C33B C34B 1.441(6) . ? 
C35B C43B 1.425(7) . ? 
C35B C36B 1.356(11) . ? 
C36B C37B 1.373(12) . ? 
C37B C38B 1.406(10) . ? 
C38B C44B 1.420(7) . ? 
C39B C40B 1.353(5) . ? 
C39B C44B 1.386(6) . ? 
C40B C41B 1.436(5) . ? 
C40B C45B 1.506(5) . ? 
C41B C42B 1.378(5) . ? 
C42B C43B 1.410(6) . ? 
C43B C44B 1.429(6) . ? 
C46B C61B 1.522(4) . ? 
C46B C47B 1.549(5) . ? 
C47B C67B 1.486(5) . ? 
C49B C54B 1.398(5) . ? 
C49B C50B 1.380(5) . ? 
C50B C51B 1.415(6) . ? 
C51B C52B 1.348(8) . ? 
C52B C53B 1.354(8) . ? 
C53B C54B 1.390(6) . ? 
C55B C60B 1.369(5) . ? 
C55B C56B 1.389(6) . ? 
C56B C57B 1.377(7) . ? 
C57B C58B 1.390(10) . ? 
C58B C59B 1.373(9) . ? 
C59B C60B 1.385(6) . ? 
C61B C66B 1.382(5) . ? 
C61B C62B 1.385(5) . ? 
C62B C63B 1.404(5) . ? 
C63B C64B 1.389(6) . ? 
C64B C65B 1.386(5) . ? 
C65B C66B 1.389(5) . ? 
C67B C68B 1.393(6) . ? 
C67B C72B 1.405(6) . ? 
C68B C69B 1.385(6) . ? 
C69B C70B 1.409(11) . ? 
C70B C71B 1.335(11) . ? 
C71B C72B 1.403(9) . ? 
C73B C74B 1.378(12) . ? 
C73B C75B 1.739(18) . ? 
C76B C78B 1.541(10) . ? 
C76B C77B 1.469(10) . ? 
C79B C80B 1.466(11) . ? 
C79B C81B 1.430(11) . ? 
  
loop_ 
 _geom_angle_atom_site_label_1 
 _geom_angle_atom_site_label_2 
 _geom_angle_atom_site_label_3 
 _geom_angle 
 _geom_angle_site_symmetry_1 
 _geom_angle_site_symmetry_3 
 _geom_angle_publ_flag 
C22A N1A C21A 114.4(3) . . ? 
C23A N2A C24A 113.5(3) . . ? 
C45A N3A C46A 111.1(3) . . ? 
C48A N4A C47A 114.3(3) . . ? 
C22B N1B C21B 112.3(3) . . ? 
C24B N2B C23B 113.4(3) . . ? 
C46B N3B C45B 113.1(2) . . ? 
C48B N4B C47B 114.1(3) . . ? 
C2A C1A C9A 120.5(4) . . ? 
C3A C2A C1A 121.2(3) . . ? 
C2A C3A C4A 120.8(4) . . ? 
C3A C4A C10A 120.2(4) . . ? 
C6A C5A C10A 118.6(3) . . ? 
C6A C5A C18A 120.1(3) . . ? 
C10A C5A C18A 121.3(3) . . ? 
O1A C6A C5A 118.8(3) . . ? 
O1A C6A C7A 119.6(3) . . ? 
C5A C6A C7A 121.6(3) . . ? 
C8A C7A C6A 119.2(3) . . ? 
C8A C7A C48A 122.2(3) . . ? 
C6A C7A C48A 118.6(3) . . ? 
C7A C8A C9A 121.7(3) . . ? 
C10A C9A C8A 118.4(3) . . ? 
C10A C9A C1A 119.2(3) . . ? 
C8A C9A C1A 122.4(3) . . ? 
C9A C10A C4A 118.0(3) . . ? 
C9A C10A C5A 120.5(3) . . ? 
C4A C10A C5A 121.5(3) . . ? 
C12A C11A C19A 121.1(4) . . ? 
C11A C12A C13A 120.6(4) . . ? 
C14A C13A C12A 119.4(4) . . ? 
C13A C14A C20A 122.2(4) . . ? 
C16A C15A C20A 123.1(3) . . ? 
C15A C16A C17A 118.4(3) . . ? 
C15A C16A C21A 122.7(3) . . ? 
C17A C16A C21A 118.8(3) . . ? 
C18A C17A O2A 117.9(3) . . ? 
C18A C17A C16A 122.1(3) . . ? 
O2A C17A C16A 120.0(3) . . ? 
C17A C18A C19A 118.8(3) . . ? 
C17A C18A C5A 120.4(3) . . ? 
C19A C18A C5A 120.9(3) . . ? 
C11A C19A C20A 118.3(3) . . ? 
C11A C19A C18A 122.0(3) . . ? 
C20A C19A C18A 119.6(3) . . ? 
C15A C20A C14A 123.6(4) . . ? 
C15A C20A C19A 118.0(3) . . ? 
C14A C20A C19A 118.4(4) . . ? 
N1A C21A C16A 111.9(3) . . ? 
N1A C22A C49A 109.7(3) . . ? 
N1A C22A C23A 109.5(3) . . ? 
C49A C22A C23A 112.0(3) . . ? 
N2A C23A C55A 114.1(3) . . ? 
N2A C23A C22A 108.8(3) . . ? 
C55A C23A C22A 111.0(3) . . ? 
N2A C24A C31A 111.3(3) . . ? 
C26A C25A C33A 120.9(4) . . ? 
C25A C26A C27A 120.6(4) . . ? 
C28A C27A C26A 120.6(4) . . ? 
C27A C28A C34A 121.0(3) . . ? 
C30A C29A C34A 118.4(3) . . ? 
C30A C29A C42A 119.7(3) . . ? 
C34A C29A C42A 121.8(3) . . ? 
C29A C30A O3A 118.7(3) . . ? 
C29A C30A C31A 122.5(3) . . ? 
O3A C30A C31A 118.8(3) . . ? 
C32A C31A C30A 117.6(4) . . ? 
C32A C31A C24A 122.1(4) . . ? 
C30A C31A C24A 120.2(4) . . ? 
C31A C32A C33A 122.6(4) . . ? 
C34A C33A C32A 119.1(3) . . ? 
C34A C33A C25A 118.7(4) . . ? 
C32A C33A C25A 122.2(4) . . ? 
C33A C34A C28A 118.2(3) . . ? 
C33A C34A C29A 119.7(3) . . ? 
C28A C34A C29A 122.1(3) . . ? 
C36A C35A C43A 120.8(4) . . ? 
C35A C36A C37A 121.3(4) . . ? 
C38A C37A C36A 119.7(4) . . ? 
C37A C38A C44A 121.6(4) . . ? 
C40A C39A C44A 122.3(3) . . ? 
C39A C40A C41A 119.4(3) . . ? 
C39A C40A C45A 120.2(3) . . ? 
C41A C40A C45A 120.3(3) . . ? 
O4A C41A C42A 118.6(3) . . ? 
O4A C41A C40A 119.9(3) . . ? 
C42A C41A C40A 121.5(3) . . ? 
C41A C42A C43A 118.3(3) . . ? 
C41A C42A C29A 120.2(3) . . ? 
C43A C42A C29A 121.5(3) . . ? 
C44A C43A C35A 117.0(3) . . ? 
C44A C43A C42A 120.6(3) . . ? 
C35A C43A C42A 122.4(3) . . ? 
C38A C44A C43A 119.7(3) . . ? 
C38A C44A C39A 122.4(4) . . ? 
C43A C44A C39A 117.9(3) . . ? 
N3A C45A C40A 111.8(3) . . ? 
N3A C46A C67A 111.9(3) . . ? 
N3A C46A C47A 108.5(3) . . ? 
C67A C46A C47A 112.2(3) . . ? 
N4A C47A C61A 113.6(3) . . ? 
N4A C47A C46A 106.9(3) . . ? 
C61A C47A C46A 110.9(3) . . ? 
N4A C48A C7A 109.5(3) . . ? 
C50A C49A C54A 117.4(3) . . ? 
C50A C49A C22A 120.9(3) . . ? 
C54A C49A C22A 121.7(3) . . ? 
C51A C50A C49A 121.3(3) . . ? 
C50A C51A C52A 119.5(3) . . ? 
C53A C52A C51A 121.0(3) . . ? 
C52A C53A C54A 119.6(3) . . ? 
C53A C54A C49A 121.3(3) . . ? 
C56A C55A C60A 117.0(4) . . ? 
C56A C55A C23A 122.0(4) . . ? 
C60A C55A C23A 121.0(4) . . ? 
C55A C56A C57A 120.4(5) . . ? 
C58A C57A C56A 121.3(5) . . ? 
C57A C58A C59A 118.3(5) . . ? 
C58A C59A C60A 120.4(5) . . ? 
C55A C60A C59A 122.5(5) . . ? 
C66A C61A C62A 119.0(4) . . ? 
C66A C61A C47A 119.8(4) . . ? 
C62A C61A C47A 121.2(4) . . ? 
C61A C62A C63A 120.0(5) . . ? 
C64A C63A C62A 120.8(5) . . ? 
C63A C64A C65A 119.6(4) . . ? 
C64A C65A C66A 120.2(5) . . ? 
C61A C66A C65A 120.2(5) . . ? 
C68A C67A C72A 117.9(4) . . ? 
C68A C67A C46A 122.1(4) . . ? 
C72A C67A C46A 120.0(4) . . ? 
C67A C68A C69A 119.7(5) . . ? 
C70A C69A C68A 119.0(6) . . ? 
C71A C70A C69A 120.7(5) . . ? 
C70A C71A C72A 121.3(6) . . ? 
C71A C72A C67A 121.4(6) . . ? 
O5A C73A C74A 120.6(7) . . ? 
O5A C73A C75A 121.5(6) . . ? 
C74A C73A C75A 118.0(6) . . ? 
C78A C76A O6A 107.6(14) . . ? 
C78A C76A C77A 115.8(16) . . ? 
O6A C76A C77A 133.8(14) . . ? 
O7A C79A C81A 120.4(10) . . ? 
O7A C79A C80A 120.3(10) . . ? 
C81A C79A C80A 119.3(11) . . ? 
C2B C1B C9B 120.7(4) . . ? 
C1B C2B C3B 120.3(4) . . ? 
C4B C3B C2B 120.5(4) . . ? 
C3B C4B C10B 120.8(4) . . ? 
C6B C5B C10B 119.5(3) . . ? 
C6B C5B C18B 119.7(3) . . ? 
C10B C5B C18B 120.8(3) . . ? 
O1B C6B C5B 119.4(3) . . ? 
O1B C6B C7B 118.8(3) . . ? 
C5B C6B C7B 121.7(3) . . ? 
C8B C7B C6B 118.6(3) . . ? 
C8B C7B C48B 122.0(3) . . ? 
C6B C7B C48B 119.4(3) . . ? 
C7B C8B C9B 121.7(3) . . ? 
C10B C9B C1B 118.5(3) . . ? 
C10B C9B C8B 119.6(3) . . ? 
C1B C9B C8B 121.8(3) . . ? 
C5B C10B C4B 122.0(3) . . ? 
C5B C10B C9B 118.9(3) . . ? 
C4B C10B C9B 119.2(3) . . ? 
C12B C11B C19B 121.6(4) . . ? 
C13B C12B C11B 119.6(4) . . ? 
C14B C13B C12B 120.4(4) . . ? 
C13B C14B C20B 122.1(4) . . ? 
C16B C15B C20B 122.7(3) . . ? 
C15B C16B C17B 117.5(3) . . ? 
C15B C16B C21B 122.5(3) . . ? 
C17B C16B C21B 120.0(3) . . ? 
O2B C17B C18B 119.6(3) . . ? 
O2B C17B C16B 118.8(3) . . ? 
C18B C17B C16B 121.6(3) . . ? 
C17B C18B C19B 120.3(3) . . ? 
C17B C18B C5B 118.7(3) . . ? 
C19B C18B C5B 121.0(3) . . ? 
C11B C19B C20B 118.0(3) . . ? 
C11B C19B C18B 123.2(3) . . ? 
C20B C19B C18B 118.8(3) . . ? 
C14B C20B C15B 122.7(4) . . ? 
C14B C20B C19B 118.3(4) . . ? 
C15B C20B C19B 119.1(3) . . ? 
C16B C21B N1B 111.9(3) . . ? 
N1B C22B C23B 109.1(3) . . ? 
N1B C22B C49B 110.9(3) . . ? 
C23B C22B C49B 109.3(3) . . ? 
N2B C23B C22B 110.4(3) . . ? 
N2B C23B C55B 112.3(3) . . ? 
C22B C23B C55B 111.7(3) . . ? 
N2B C24B C31B 113.2(3) . . ? 
C26B C25B C33B 121.2(4) . . ? 
C25B C26B C27B 119.8(4) . . ? 
C28B C27B C26B 120.5(4) . . ? 
C27B C28B C34B 122.5(5) . . ? 
C30B C29B C34B 119.3(4) . . ? 
C30B C29B C42B 119.0(3) . . ? 
C34B C29B C42B 121.7(3) . . ? 
O3B C30B C29B 119.3(3) . . ? 
O3B C30B C31B 119.2(3) . . ? 
C29B C30B C31B 121.4(3) . . ? 
C32B C31B C30B 118.6(3) . . ? 
C32B C31B C24B 121.8(3) . . ? 
C30B C31B C24B 119.5(3) . . ? 
C31B C32B C33B 122.7(4) . . ? 
C32B C33B C34B 118.3(3) . . ? 
C32B C33B C25B 123.6(4) . . ? 
C34B C33B C25B 118.1(4) . . ? 
C28B C34B C33B 118.0(4) . . ? 
C28B C34B C29B 122.6(4) . . ? 
C33B C34B C29B 119.4(3) . . ? 
C43B C35B C36B 121.1(7) . . ? 
C37B C36B C35B 122.4(6) . . ? 
C36B C37B C38B 119.1(7) . . ? 
C37B C38B C44B 120.2(7) . . ? 
C40B C39B C44B 122.0(4) . . ? 
C39B C40B C41B 119.6(3) . . ? 
C39B C40B C45B 121.6(3) . . ? 
C41B C40B C45B 118.8(3) . . ? 
O4B C41B C42B 118.7(3) . . ? 
O4B C41B C40B 120.7(3) . . ? 
C42B C41B C40B 120.7(4) . . ? 
C41B C42B C43B 118.7(4) . . ? 
C41B C42B C29B 119.3(4) . . ? 
C43B C42B C29B 122.0(4) . . ? 
C35B C43B C42B 121.9(5) . . ? 
C35B C43B C44B 117.6(5) . . ? 
C42B C43B C44B 120.4(4) . . ? 
C39B C44B C38B 122.0(5) . . ? 
C39B C44B C43B 118.5(4) . . ? 
C38B C44B C43B 119.4(4) . . ? 
N3B C45B C40B 113.8(3) . . ? 
N3B C46B C61B 110.4(3) . . ? 
N3B C46B C47B 109.8(2) . . ? 
C61B C46B C47B 111.4(3) . . ? 
C67B C47B N4B 112.7(3) . . ? 
C67B C47B C46B 112.8(3) . . ? 
N4B C47B C46B 109.5(3) . . ? 
N4B C48B C7B 111.6(3) . . ? 
C54B C49B C50B 120.0(3) . . ? 
C54B C49B C22B 119.7(3) . . ? 
C50B C49B C22B 120.3(3) . . ? 
C49B C50B C51B 119.0(4) . . ? 
C52B C51B C50B 119.9(5) . . ? 
C51B C52B C53B 121.5(4) . . ? 
C52B C53B C54B 120.6(4) . . ? 
C49B C54B C53B 119.0(4) . . ? 
C60B C55B C56B 118.1(4) . . ? 
C60B C55B C23B 122.5(3) . . ? 
C56B C55B C23B 119.5(3) . . ? 
C57B C56B C55B 120.7(5) . . ? 
C56B C57B C58B 119.9(6) . . ? 
C59B C58B C57B 120.2(5) . . ? 
C58B C59B C60B 118.7(5) . . ? 
C55B C60B C59B 122.4(5) . . ? 
C66B C61B C62B 119.2(3) . . ? 
C66B C61B C46B 120.4(3) . . ? 
C62B C61B C46B 120.4(3) . . ? 
C61B C62B C63B 120.3(3) . . ? 
C64B C63B C62B 119.8(3) . . ? 
C63B C64B C65B 119.7(3) . . ? 
C66B C65B C64B 119.9(3) . . ? 
C65B C66B C61B 121.0(3) . . ? 
C68B C67B C72B 119.3(4) . . ? 
C68B C67B C47B 120.6(3) . . ? 
C72B C67B C47B 120.1(4) . . ? 
C67B C68B C69B 121.6(5) . . ? 
C70B C69B C68B 118.0(6) . . ? 
C71B C70B C69B 120.7(5) . . ? 
C70B C71B C72B 122.4(6) . . ? 
C71B C72B C67B 117.9(6) . . ? 
O5B C73B C74B 116.4(9) . . ? 
O5B C73B C75B 149.9(10) . . ? 
C74B C73B C75B 81.3(10) . . ? 
O6B C76B C78B 118.2(7) . . ? 
O6B C76B C77B 135.3(8) . . ? 
C78B C76B C77B 106.3(7) . . ? 
O7B C79B C80B 122.7(8) . . ? 
O7B C79B C81B 129.0(8) . . ? 
C80B C79B C81B 107.7(9) . . ? 
  
_diffrn_measured_fraction_theta_max    0.978 
_diffrn_reflns_theta_full              32.53 
_diffrn_measured_fraction_theta_full   0.978 
_refine_diff_density_max    1.643 
_refine_diff_density_min   -0.495 
_refine_diff_density_rms    0.123 
  
